# Supplementary material for: Alkyl substituent-dependent systematic change in cold crystallization of azo molecules
Source: Royal Society of Chemistry journal article supplement (doi:10.1039/d2ra00942k), 2022-01-01
Supplement: d2ra00942k1.pdf [file d2ra00942k1.pdf]

# Supplementary Information

## **Alkyl Substituent-Dependent Systematic Change in Cold Crystallization of Azo Molecules**

**Akinori Honda\*, Yukie Hibi, Kazuma Matsumoto, Masato Kawai, and Kazuo Miyamura\***

Department of Chemistry, Faculty of Science, Tokyo University of Science, 1-3 Kagurazaka,  
Shinjuku-ku, Tokyo 162-8601, Japan.

\*[honda-akinori@rs.tus.ac.jp](mailto:honda-akinori@rs.tus.ac.jp) (A. Honda), [miyamura@rs.kagu.tus.ac.jp](mailto:miyamura@rs.kagu.tus.ac.jp) (K. Miyamura)

### Identification of 2,4-DM-4-C<sub>n</sub> and 2,4-DM-2-C<sub>n</sub>

**2,4-DM-4-C2:** Yield: 0.051 g (5.6%); elemental analysis for C<sub>20</sub>H<sub>20</sub>N<sub>2</sub>O, Calc: C, 78.92; H, 6.62; N, 9.20%, Found: C, 78.74; H, 6.67; N, 9.25%. <sup>1</sup>H NMR (400 MHz, CDCl<sub>3</sub>, Me<sub>4</sub>Si): δ 8.99 (d, *J* = 8.4 Hz, 1H<sub>arom</sub>), 8.35 (d, *J* = 8.3 Hz, 1H<sub>arom</sub>), 7.86 (d, *J* = 8.4 Hz, 1H<sub>arom</sub>), 7.72 (d, *J* = 8.2 Hz, 1H<sub>arom</sub>), 7.66 (t, *J* = 7.6 Hz, 1H<sub>arom</sub>), 7.56 (t, *J* = 7.6 Hz, 1H<sub>arom</sub>), 7.16 (s, 1H<sub>arom</sub>), 7.11 (d, *J* = 8.1 Hz, 1H<sub>arom</sub>), 6.89 (d, *J* = 8.5 Hz, 1H<sub>arom</sub>), 4.30 (q, *J* = 7.0 Hz, 2H, O-CH<sub>2</sub>-C), 2.74 (s, 3H, C<sub>arom</sub>-CH<sub>3</sub>), 2.40 (s, 3H, C<sub>arom</sub>-CH<sub>3</sub>), 1.59 (t, *J* = 7.0 Hz, 3H, C-CH<sub>3</sub>); IR (KBr): ν 1580 cm<sup>-1</sup> (C=C), 2881–2948 (C-H), 3019–3076 (C-H<sub>arom</sub>).

**2,4-DM-4-C3:** Yield: 0.0051 g (0.53%); elemental analysis for C<sub>21</sub>H<sub>22</sub>N<sub>2</sub>O, Calc: C, 79.21; H, 6.96; N, 8.80%, Found: C, 78.84; H, 6.62; N, 8.77%. <sup>1</sup>H NMR (400 MHz, CDCl<sub>3</sub>, Me<sub>4</sub>Si): δ 8.99 (d, *J* = 8.4 Hz, 1H<sub>arom</sub>), 8.35 (d, *J* = 8.3 Hz, 1H<sub>arom</sub>), 7.86 (d, *J* = 8.4 Hz, 1H<sub>arom</sub>), 7.72 (d, *J* = 7.9 Hz, 1H<sub>arom</sub>), 7.66 (t, *J* = 7.7 Hz, 1H<sub>arom</sub>), 7.56 (t, *J* = 7.6 Hz, 1H<sub>arom</sub>), 7.16 (s, 1H<sub>arom</sub>), 7.11 (d, *J* = 8.0 Hz, 1H<sub>arom</sub>), 6.90 (d, *J* = 8.5 Hz, 1H<sub>arom</sub>), 4.19 (t, *J* = 6.4 Hz, 2H, O-CH<sub>2</sub>-C), 2.75 (s, 3H, C<sub>arom</sub>-CH<sub>3</sub>), 2.40 (s, 3H, C<sub>arom</sub>-CH<sub>3</sub>), 2.00 (sext, *J* = 7.0 Hz, 2H, C-CH<sub>2</sub>-C), 1.17 (t, *J* = 7.4 Hz, 3H, C-CH<sub>3</sub>); IR (KBr): ν 1578 cm<sup>-1</sup> (C=C), 2872–2952 (C-H), 3018–3074 (C-H<sub>arom</sub>).

**2,4-DM-4-C5:** Yield: 0.072 g (6.9%); elemental analysis for C<sub>23</sub>H<sub>26</sub>N<sub>2</sub>O, Calc: C, 79.73; H, 7.56; N, 8.09%, Found: C, 79.62; H, 7.69; N, 8.04%. <sup>1</sup>H NMR (400 MHz, CDCl<sub>3</sub>, Me<sub>4</sub>Si): δ 9.00 (d, *J* = 8.4 Hz, 1H<sub>arom</sub>), 8.34 (d, *J* = 8.4 Hz, 1H<sub>arom</sub>), 7.86 (d, *J* = 8.4 Hz, 1H<sub>arom</sub>), 7.72 (d, *J* = 8.2 Hz, 1H<sub>arom</sub>), 7.66 (t, *J* = 7.6 Hz, 1H<sub>arom</sub>), 7.56 (t, *J* = 7.6 Hz, 1H<sub>arom</sub>), 7.16 (s, 1H<sub>arom</sub>), 7.11 (d, *J* = 8.2 Hz, 1H<sub>arom</sub>), 6.90 (d, *J* = 8.5 Hz, 1H<sub>arom</sub>), 4.22 (t, *J* = 6.4 Hz, 2H, O-CH<sub>2</sub>-C), 2.74 (s, 3H, C<sub>arom</sub>-CH<sub>3</sub>), 2.40 (s, 3H, C<sub>arom</sub>-CH<sub>3</sub>), 1.97 (quin, *J* = 7.0 Hz, 2H, O-C-CH<sub>2</sub>-C), 1.45 (sext, *J* = 7.2 Hz, 4H, C-CH<sub>2</sub>-C), 0.98 (t, *J* = 7.2 Hz, 3H, C-CH<sub>3</sub>); IR (KBr): ν 1581 cm<sup>-1</sup> (C=C), 2864–2955 (C-H), 3014–3069 (C-H<sub>arom</sub>).

**2,4-DM-4-C6:** Yield: 0.0056 g (0.52%); elemental analysis for C<sub>24</sub>H<sub>28</sub>N<sub>2</sub>O, Calc: C, 79.96; H, 7.83; N, 7.77%, Found: C, 79.57; H, 7.84; N, 7.70%. <sup>1</sup>H NMR (400 MHz, CDCl<sub>3</sub>, Me<sub>4</sub>Si): δ 9.00 (d, *J* = 8.3 Hz, 1H<sub>arom</sub>), 8.34 (d, *J* = 8.0 Hz, 1H<sub>arom</sub>), 7.86 (d, *J* = 8.4 Hz, 1H<sub>arom</sub>), 7.72 (d, *J* = 8.1 Hz, 1H<sub>arom</sub>), 7.66 (t, *J* = 7.0 Hz, 1H<sub>arom</sub>), 7.56 (t, *J* = 7.0 Hz, 1H<sub>arom</sub>), 7.16 (s, 1H<sub>arom</sub>), 7.10 (d, *J* = 8.3 Hz, 1H<sub>arom</sub>), 6.90 (d, *J* = 8.5 Hz, 1H<sub>arom</sub>), 4.22 (t, *J* = 6.3 Hz, 2H, O-CH<sub>2</sub>-C), 2.74 (s, 3H, C<sub>arom</sub>-CH<sub>3</sub>), 2.40 (s, 3H, C<sub>arom</sub>-CH<sub>3</sub>), 1.97 (quin, *J* = 6.9 Hz, 2H, O-C-CH<sub>2</sub>-C), 1.43–1.29 (m, 6H, C-CH<sub>2</sub>-C), 0.94 (t, *J* = 7.0 Hz, 3H, C-CH<sub>3</sub>); IR (KBr): ν 1579 cm<sup>-1</sup> (C=C), 2856–2937 (C-H), 3012–3064 (C-H<sub>arom</sub>).

**2,4-DM-4-C7:** Yield: 0.084 g (7.5%); elemental analysis for C<sub>25</sub>H<sub>30</sub>N<sub>2</sub>O, Calc: C, 80.17; H, 8.07; N, 7.48%, Found: C, 80.36; H, 8.24; N, 7.78%. <sup>1</sup>H NMR (400 MHz, CDCl<sub>3</sub>, Me<sub>4</sub>Si): δ 9.00 (d, *J* = 8.4 Hz, 1H<sub>arom</sub>), 8.34 (d, *J* = 8.2 Hz, 1H<sub>arom</sub>), 7.86 (d, *J* = 8.4 Hz, 1H<sub>arom</sub>), 7.72 (d, *J* = 8.2 Hz, 1H<sub>arom</sub>), 7.66 (t, *J* = 7.6 Hz, 1H<sub>arom</sub>), 7.56 (t, *J* = 7.6 Hz, 1H<sub>arom</sub>), 7.16 (s, 1H<sub>arom</sub>), 7.10 (d, *J* = 8.3 Hz, 1H<sub>arom</sub>), 6.89 (d, *J* = 8.5 Hz, 1H<sub>arom</sub>), 4.22 (t, *J* = 6.4 Hz, 2H, O-CH<sub>2</sub>-C), 2.74 (s, 3H, C<sub>arom</sub>-CH<sub>3</sub>), 2.40 (s, 3H, C<sub>arom</sub>-CH<sub>3</sub>), 1.97 (quin, *J* = 7.0 Hz, 2H, O-C-CH<sub>2</sub>-C), 1.45–1.26 (m, 8H, C-CH<sub>2</sub>-C), 0.91 (t, *J* = 7.0 Hz, 3H, C-CH<sub>3</sub>); IR (KBr): ν 1580 cm<sup>-1</sup> (C=C), 2858–2961 (C-H), 3023–3076 (C-H<sub>arom</sub>).

**2,4-DM-4-C8:** Yield: 0.030 g (2.5%); elemental analysis for C<sub>26</sub>H<sub>32</sub>N<sub>2</sub>O, Calc: C, 80.37; H, 8.30; N, 7.21%, Found: C, 80.28; H, 8.50; N, 7.11%. <sup>1</sup>H NMR (400 MHz, CDCl<sub>3</sub>, Me<sub>4</sub>Si): δ 9.00 (d, *J* = 8.4 Hz,

$1H_{\text{arom}}$ ), 8.34 (d,  $J = 8.4$  Hz,  $1H_{\text{arom}}$ ), 7.86 (d,  $J = 8.4$  Hz,  $1H_{\text{arom}}$ ), 7.72 (d,  $J = 8.2$  Hz,  $1H_{\text{arom}}$ ), 7.66 (t,  $J = 7.6$  Hz,  $1H_{\text{arom}}$ ), 7.56 (t,  $J = 7.3$  Hz,  $1H_{\text{arom}}$ ), 7.16 (s,  $1H_{\text{arom}}$ ), 7.10 (d,  $J = 8.1$  Hz,  $1H_{\text{arom}}$ ), 6.89 (d,  $J = 8.5$  Hz,  $1H_{\text{arom}}$ ), 4.22 (t,  $J = 6.4$  Hz, 2H, O-CH<sub>2</sub>-C), 2.74 (s, 3H, C<sub>arom</sub>-CH<sub>3</sub>), 2.40 (s, 3H, C<sub>arom</sub>-CH<sub>3</sub>), 1.97 (quin,  $J = 7.0$  Hz, 2H, O-C-CH<sub>2</sub>-C), 1.48–1.26 (m, 10H, C-CH<sub>2</sub>-C), 0.90 (t,  $J = 6.8$  Hz, 3H, C-CH<sub>3</sub>); IR (KBr):  $\nu$  1577 cm<sup>-1</sup> (C=C), 2856–2966 (C-H), 3031–3068 (C-H<sub>arom</sub>).

**2,4-DM-4-C9:** Yield: 0.064 g (5.3%); elemental analysis for C<sub>27</sub>H<sub>34</sub>N<sub>2</sub>O, Calc: C, 80.55; H, 8.51; N, 6.96%, Found: C, 80.45; H, 8.77; N, 6.96%. <sup>1</sup>H NMR (400 MHz, CDCl<sub>3</sub>, Me<sub>4</sub>Si):  $\delta$  9.00 (d,  $J = 8.4$  Hz,  $1H_{\text{arom}}$ ), 8.34 (d,  $J = 8.4$  Hz,  $1H_{\text{arom}}$ ), 7.86 (d,  $J = 8.4$  Hz,  $1H_{\text{arom}}$ ), 7.72 (d,  $J = 8.2$  Hz,  $1H_{\text{arom}}$ ), 7.66 (t,  $J = 7.6$  Hz,  $1H_{\text{arom}}$ ), 7.56 (t,  $J = 7.6$  Hz,  $1H_{\text{arom}}$ ), 7.16 (s,  $1H_{\text{arom}}$ ), 7.10 (d,  $J = 8.3$  Hz,  $1H_{\text{arom}}$ ), 6.89 (d,  $J = 8.5$  Hz,  $1H_{\text{arom}}$ ), 4.22 (t,  $J = 6.4$  Hz, 2H, O-CH<sub>2</sub>-C), 2.74 (s, 3H, C<sub>arom</sub>-CH<sub>3</sub>), 2.40 (s, 3H, C<sub>arom</sub>-CH<sub>3</sub>), 1.96 (quin,  $J = 7.0$  Hz, 2H, O-C-CH<sub>2</sub>-C), 1.54–1.23 (m, 12H, C-CH<sub>2</sub>-C), 0.89 (t,  $J = 6.8$  Hz, 3H, C-CH<sub>3</sub>); IR (KBr):  $\nu$  1579 cm<sup>-1</sup> (C=C), 2846–2962 (C-H), 3019–3076 (C-H<sub>arom</sub>).

**2,4-DM-4-C10:** Yield: 0.052 g (4.2%); elemental analysis for C<sub>28</sub>H<sub>36</sub>N<sub>2</sub>O, Calc: C, 80.73; H, 8.71; N, 6.72%, Found: C, 80.55; H, 8.96; N, 6.89%. <sup>1</sup>H NMR (400 MHz, CDCl<sub>3</sub>, Me<sub>4</sub>Si):  $\delta$  9.00 (d,  $J = 8.3$  Hz,  $1H_{\text{arom}}$ ), 8.34 (d,  $J = 8.5$  Hz,  $1H_{\text{arom}}$ ), 7.86 (d,  $J = 8.4$  Hz,  $1H_{\text{arom}}$ ), 7.72 (d,  $J = 8.2$  Hz,  $1H_{\text{arom}}$ ), 7.66 (t,  $J = 7.3$  Hz,  $1H_{\text{arom}}$ ), 7.56 (t,  $J = 7.4$  Hz,  $1H_{\text{arom}}$ ), 7.16 (s,  $1H_{\text{arom}}$ ), 7.10 (d,  $J = 8.3$  Hz,  $1H_{\text{arom}}$ ), 6.89 (d,  $J = 8.5$  Hz,  $1H_{\text{arom}}$ ), 4.22 (t,  $J = 6.4$  Hz, 2H, O-CH<sub>2</sub>-C), 2.74 (s, 3H, C<sub>arom</sub>-CH<sub>3</sub>), 2.40 (s, 3H, C<sub>arom</sub>-CH<sub>3</sub>), 1.96 (quin,  $J = 7.0$  Hz, 2H, O-C-CH<sub>2</sub>-C), 1.44–1.26 (m, 14H, C-CH<sub>2</sub>-C), 0.89 (t,  $J = 6.8$  Hz, 3H, C-CH<sub>3</sub>); IR (KBr):  $\nu$  1579 cm<sup>-1</sup> (C=C), 2848–2963 (C-H), 3021–3073 (C-H<sub>arom</sub>).

**2,4-DM-4-C11:** Yield: 0.087 g (6.7%); elemental analysis for C<sub>29</sub>H<sub>38</sub>N<sub>2</sub>O, Calc: C, 80.88; H, 8.89; N, 6.51%, Found: C, 80.92; H, 9.06; N, 6.55%. <sup>1</sup>H NMR (400 MHz, CDCl<sub>3</sub>, Me<sub>4</sub>Si):  $\delta$  9.00 (d,  $J = 8.4$  Hz,  $1H_{\text{arom}}$ ), 8.34 (d,  $J = 8.5$  Hz,  $1H_{\text{arom}}$ ), 7.86 (d,  $J = 8.4$  Hz,  $1H_{\text{arom}}$ ), 7.72 (d,  $J = 8.2$  Hz,  $1H_{\text{arom}}$ ), 7.66 (t,  $J = 7.3$  Hz,  $1H_{\text{arom}}$ ), 7.56 (t,  $J = 7.8$  Hz,  $1H_{\text{arom}}$ ), 7.16 (s,  $1H_{\text{arom}}$ ), 7.10 (d,  $J = 8.0$  Hz,  $1H_{\text{arom}}$ ), 6.89 (d,  $J = 8.5$  Hz,  $1H_{\text{arom}}$ ), 4.22 (t,  $J = 6.4$  Hz, 2H, O-CH<sub>2</sub>-C), 2.74 (s, 3H, C<sub>arom</sub>-CH<sub>3</sub>), 2.40 (s, 3H, C<sub>arom</sub>-CH<sub>3</sub>), 1.96 (quin,  $J = 7.0$  Hz, 2H, O-C-CH<sub>2</sub>-C), 1.44–1.26 (m, 16H, C-CH<sub>2</sub>-C), 0.88 (t,  $J = 6.8$  Hz, 3H, C-CH<sub>3</sub>); IR (KBr):  $\nu$  1578 cm<sup>-1</sup> (C=C), 2851–2952 (C-H), 3021–3073 (C-H<sub>arom</sub>).

**2,4-DM-4-C12:** Yield: 0.04 g (3.0%); elemental analysis for C<sub>30</sub>H<sub>38</sub>N<sub>2</sub>O, Calc: C, 81.03; H, 9.07; N, 6.30%, Found: C, 81.33; H, 9.01; N, 6.19%. <sup>1</sup>H NMR (400 MHz, CDCl<sub>3</sub>, Me<sub>4</sub>Si):  $\delta$  9.00 (d,  $J = 8.4$  Hz,  $1H_{\text{arom}}$ ), 8.34 (d,  $J = 8.3$  Hz,  $1H_{\text{arom}}$ ), 7.86 (d,  $J = 8.4$  Hz,  $1H_{\text{arom}}$ ), 7.72 (d,  $J = 8.2$  Hz,  $1H_{\text{arom}}$ ), 7.66 (t,  $J = 7.4$  Hz,  $1H_{\text{arom}}$ ), 7.56 (t,  $J = 7.1$  Hz,  $1H_{\text{arom}}$ ), 7.16 (s,  $1H_{\text{arom}}$ ), 7.10 (d,  $J = 8.3$  Hz,  $1H_{\text{arom}}$ ), 6.89 (d,  $J = 8.5$  Hz,  $1H_{\text{arom}}$ ), 4.22 (t,  $J = 6.4$  Hz, 2H, O-CH<sub>2</sub>-C), 2.74 (s, 3H, C<sub>arom</sub>-CH<sub>3</sub>), 2.40 (s, 3H, C<sub>arom</sub>-CH<sub>3</sub>), 1.96 (quin,  $J = 7.1$  Hz, 2H, O-C-CH<sub>2</sub>-C), 1.44–1.22 (m, 18H, C-CH<sub>2</sub>-C), 0.88 (t,  $J = 6.8$  Hz, 3H, C-CH<sub>3</sub>); IR (KBr):  $\nu$  1579 cm<sup>-1</sup> (C=C), 2847–2954 (C-H), 3013–3069 (C-H<sub>arom</sub>).

**2,4-DM-4-C13:** Yield: 0.099 g (7.2%); elemental analysis for C<sub>31</sub>H<sub>40</sub>N<sub>2</sub>O, Calc: C, 81.17; H, 9.23; N, 6.11%, Found: C, 81.28; H, 9.14; N, 6.02%. <sup>1</sup>H NMR (400 MHz, CDCl<sub>3</sub>, Me<sub>4</sub>Si):  $\delta$  9.00 (d,  $J = 8.4$  Hz,  $1H_{\text{arom}}$ ), 8.34 (d,  $J = 8.4$  Hz,  $1H_{\text{arom}}$ ), 7.86 (d,  $J = 8.4$  Hz,  $1H_{\text{arom}}$ ), 7.72 (d,  $J = 8.2$  Hz,  $1H_{\text{arom}}$ ), 7.65 (t,  $J = 7.4$  Hz,  $1H_{\text{arom}}$ ), 7.56 (t,  $J = 7.2$  Hz,  $1H_{\text{arom}}$ ), 7.16 (s,  $1H_{\text{arom}}$ ), 7.10 (d,  $J = 8.2$  Hz,  $1H_{\text{arom}}$ ), 6.89 (d,  $J = 8.5$  Hz,  $1H_{\text{arom}}$ ), 4.22 (t,  $J = 6.4$  Hz, 2H, O-CH<sub>2</sub>-C), 2.74 (s, 3H, C<sub>arom</sub>-CH<sub>3</sub>), 2.40 (s, 3H, C<sub>arom</sub>-CH<sub>3</sub>),

1.96 (quin,  $J = 7.0$  Hz, 2H, O–C–CH<sub>2</sub>–C), 1.44–1.21 (m, 20H, C–CH<sub>2</sub>–C), 0.88 (t,  $J = 6.8$  Hz, 3H, C–CH<sub>3</sub>); IR (KBr):  $\nu$  1577 cm<sup>-1</sup> (C=C), 2845–2950 (C–H), 3015–3072 (C–H<sub>arom</sub>).

**2,4-DM-4-C14:** Yield: 0.019 g (1.4%); elemental analysis for C<sub>32</sub>H<sub>42</sub>N<sub>2</sub>O, Calc: C, 81.31; H, 9.38; N, 5.93%, Found: C, 81.55; H, 9.22; N, 5.79%. <sup>1</sup>H NMR (400 MHz, CDCl<sub>3</sub>, Me<sub>4</sub>Si):  $\delta$  9.00 (d,  $J = 8.6$  Hz, 1H<sub>arom</sub>), 8.34 (d,  $J = 8.6$  Hz, 1H<sub>arom</sub>), 7.86 (d,  $J = 8.4$  Hz, 1H<sub>arom</sub>), 7.72 (d,  $J = 8.2$  Hz, 1H<sub>arom</sub>), 7.65 (t,  $J = 7.3$  Hz, 1H<sub>arom</sub>), 7.56 (t,  $J = 7.6$  Hz, 1H<sub>arom</sub>), 7.16 (s, 1H<sub>arom</sub>), 7.10 (d,  $J = 8.1$  Hz, 1H<sub>arom</sub>), 6.89 (d,  $J = 8.5$  Hz, 1H<sub>arom</sub>), 4.22 (t,  $J = 6.4$  Hz, 2H, O–CH<sub>2</sub>–C), 2.74 (s, 3H, C<sub>arom</sub>–CH<sub>3</sub>), 2.40 (s, 3H, C<sub>arom</sub>–CH<sub>3</sub>), 1.96 (quin,  $J = 7.0$  Hz, 2H, O–C–CH<sub>2</sub>–C), 1.49–1.26 (m, 22H, C–CH<sub>2</sub>–C), 0.88 (t,  $J = 6.8$  Hz, 3H, C–CH<sub>3</sub>); IR (KBr):  $\nu$  1578 cm<sup>-1</sup> (C=C), 2848–2952 (C–H), 3016–3073 (C–H<sub>arom</sub>).

**2,4-DM-4-C15:** Yield: 0.23 g (15%); elemental analysis for C<sub>33</sub>H<sub>44</sub>N<sub>2</sub>O, Calc: C, 81.43; H, 9.53; N, 5.76%, Found: C, 81.35; H, 9.38; N, 5.69%. <sup>1</sup>H NMR (400 MHz, CDCl<sub>3</sub>, Me<sub>4</sub>Si):  $\delta$  9.00 (d,  $J = 8.3$  Hz, 1H<sub>arom</sub>), 8.34 (d,  $J = 8.4$  Hz, 1H<sub>arom</sub>), 7.86 (d,  $J = 8.4$  Hz, 1H<sub>arom</sub>), 7.72 (d,  $J = 8.2$  Hz, 1H<sub>arom</sub>), 7.65 (t,  $J = 7.6$  Hz, 1H<sub>arom</sub>), 7.56 (t,  $J = 7.1$  Hz, 1H<sub>arom</sub>), 7.16 (s, 1H<sub>arom</sub>), 7.10 (d,  $J = 8.2$  Hz, 1H<sub>arom</sub>), 6.89 (d,  $J = 8.5$  Hz, 1H<sub>arom</sub>), 4.22 (t,  $J = 6.4$  Hz, 2H, O–CH<sub>2</sub>–C), 2.74 (s, 3H, C<sub>arom</sub>–CH<sub>3</sub>), 2.40 (s, 3H, C<sub>arom</sub>–CH<sub>3</sub>), 1.96 (quin,  $J = 7.0$  Hz, 2H, O–C–CH<sub>2</sub>–C), 1.49–1.26 (m, 24H, C–CH<sub>2</sub>–C), 0.88 (t,  $J = 6.8$  Hz, 3H, C–CH<sub>3</sub>); IR (KBr):  $\nu$  1577 cm<sup>-1</sup> (C=C), 2848–2951 (C–H), 3019–3070 (C–H<sub>arom</sub>).

**2,4-DM-4-C16:** Yield: 0.093 g (6.2%); elemental analysis for C<sub>34</sub>H<sub>46</sub>N<sub>2</sub>O, Calc: C, 81.55; H, 9.66; N, 5.59%, Found: C, 81.49; H, 9.71; N, 5.46%. <sup>1</sup>H NMR (400 MHz, CDCl<sub>3</sub>, Me<sub>4</sub>Si):  $\delta$  9.00 (d,  $J = 8.4$  Hz, 1H<sub>arom</sub>), 8.34 (d,  $J = 8.2$  Hz, 1H<sub>arom</sub>), 7.86 (d,  $J = 8.4$  Hz, 1H<sub>arom</sub>), 7.72 (d,  $J = 8.2$  Hz, 1H<sub>arom</sub>), 7.65 (t,  $J = 7.6$  Hz, 1H<sub>arom</sub>), 7.56 (t,  $J = 7.6$  Hz, 1H<sub>arom</sub>), 7.16 (s, 1H<sub>arom</sub>), 7.10 (d,  $J = 8.1$  Hz, 1H<sub>arom</sub>), 6.89 (d,  $J = 8.5$  Hz, 1H<sub>arom</sub>), 4.22 (t,  $J = 6.4$  Hz, 2H, O–CH<sub>2</sub>–C), 2.74 (s, 3H, C<sub>arom</sub>–CH<sub>3</sub>), 2.40 (s, 3H, C<sub>arom</sub>–CH<sub>3</sub>), 1.96 (quin,  $J = 7.0$  Hz, 2H, O–C–CH<sub>2</sub>–C), 1.43–1.26 (m, 24H, C–CH<sub>2</sub>–C), 0.88 (t,  $J = 6.8$  Hz, 3H, C–CH<sub>3</sub>); IR (KBr):  $\nu$  1577 cm<sup>-1</sup> (C=C), 2847–2953 (C–H), 3016–3073 (C–H<sub>arom</sub>).

**2,4-DM-4-C17:** Yield: 0.10 g (6.7%); elemental analysis for C<sub>35</sub>H<sub>48</sub>N<sub>2</sub>O, Calc: C, 81.66; H, 9.79; N, 5.44%, Found: C, 81.43; H, 9.73; N, 5.41%. <sup>1</sup>H NMR (400 MHz, CDCl<sub>3</sub>, Me<sub>4</sub>Si):  $\delta$  9.00 (d,  $J = 8.4$  Hz, 1H<sub>arom</sub>), 8.34 (d,  $J = 8.3$  Hz, 1H<sub>arom</sub>), 7.86 (d,  $J = 8.4$  Hz, 1H<sub>arom</sub>), 7.72 (d,  $J = 8.2$  Hz, 1H<sub>arom</sub>), 7.65 (t,  $J = 7.4$  Hz, 1H<sub>arom</sub>), 7.56 (t,  $J = 7.6$  Hz, 1H<sub>arom</sub>), 7.16 (s, 1H<sub>arom</sub>), 7.10 (d,  $J = 7.6$  Hz, 1H<sub>arom</sub>), 6.89 (d,  $J = 8.5$  Hz, 1H<sub>arom</sub>), 4.22 (t,  $J = 6.4$  Hz, 2H, O–CH<sub>2</sub>–C), 2.74 (s, 3H, C<sub>arom</sub>–CH<sub>3</sub>), 2.40 (s, 3H, C<sub>arom</sub>–CH<sub>3</sub>), 1.96 (quin,  $J = 7.0$  Hz, 2H, O–C–CH<sub>2</sub>–C), 1.50–1.26 (m, 28H, C–CH<sub>2</sub>–C), 0.88 (t,  $J = 6.8$  Hz, 3H, C–CH<sub>3</sub>); IR (KBr):  $\nu$  1576 cm<sup>-1</sup> (C=C), 2849–2951 (C–H), 3014–3072 (C–H<sub>arom</sub>).

**2,4-DM-4-C18:** Yield: 0.078 g (4.9%); elemental analysis for C<sub>36</sub>H<sub>50</sub>N<sub>2</sub>O, Calc: C, 81.77; H, 9.91; N, 5.30%, Found: C, 81.91; H, 9.80; N, 5.11%. <sup>1</sup>H NMR (400 MHz, CDCl<sub>3</sub>, Me<sub>4</sub>Si):  $\delta$  9.00 (d,  $J = 8.3$  Hz, 1H<sub>arom</sub>), 8.34 (d,  $J = 8.3$  Hz, 1H<sub>arom</sub>), 7.86 (d,  $J = 8.4$  Hz, 1H<sub>arom</sub>), 7.72 (d,  $J = 8.2$  Hz, 1H<sub>arom</sub>), 7.65 (t,  $J = 7.3$  Hz, 1H<sub>arom</sub>), 7.56 (t,  $J = 7.4$  Hz, 1H<sub>arom</sub>), 7.16 (s, 1H<sub>arom</sub>), 7.10 (d,  $J = 8.2$  Hz, 1H<sub>arom</sub>), 6.89 (d,  $J = 8.5$  Hz, 1H<sub>arom</sub>), 4.22 (t,  $J = 6.4$  Hz, 2H, O–CH<sub>2</sub>–C), 2.74 (s, 3H, C<sub>arom</sub>–CH<sub>3</sub>), 2.40 (s, 3H, C<sub>arom</sub>–CH<sub>3</sub>), 1.96 (quin,  $J = 7.0$  Hz, 2H, O–C–CH<sub>2</sub>–C), 1.50–1.26 (m, 30H, C–CH<sub>2</sub>–C), 0.88 (t,  $J = 6.8$  Hz, 3H, C–CH<sub>3</sub>); IR (KBr):  $\nu$  1580 cm<sup>-1</sup> (C=C), 2851–2949 (C–H), 3016–3074 (C–H<sub>arom</sub>).

**2,4-DM-4-C20:** Yield: 0.14 g (8.2%); elemental analysis for C<sub>37</sub>H<sub>52</sub>N<sub>2</sub>O, Calc: C, 81.96; H, 10.14; N,

5.03%, Found: C, 81.73; H, 10.25; N, 4.78%.  $^1\text{H NMR}$  (400 MHz,  $\text{CDCl}_3$ ,  $\text{Me}_4\text{Si}$ ):  $\delta$  9.00 (d,  $J = 8.4$  Hz,  $1\text{H}_{\text{arom}}$ ), 8.34 (d,  $J = 8.4$  Hz,  $1\text{H}_{\text{arom}}$ ), 7.86 (d,  $J = 8.4$  Hz,  $1\text{H}_{\text{arom}}$ ), 7.72 (d,  $J = 8.2$  Hz,  $1\text{H}_{\text{arom}}$ ), 7.65 (t,  $J = 7.6$  Hz,  $1\text{H}_{\text{arom}}$ ), 7.56 (t,  $J = 7.0$  Hz,  $1\text{H}_{\text{arom}}$ ), 7.16 (s,  $1\text{H}_{\text{arom}}$ ), 7.10 (d,  $J = 7.8$  Hz,  $1\text{H}_{\text{arom}}$ ), 6.89 (d,  $J = 8.5$  Hz,  $1\text{H}_{\text{arom}}$ ), 4.22 (t,  $J = 6.4$  Hz, 2H, O- $\text{CH}_2$ -C), 2.74 (s, 3H,  $\text{C}_{\text{arom}}$ - $\text{CH}_3$ ), 2.40 (s, 3H,  $\text{C}_{\text{arom}}$ - $\text{CH}_3$ ), 1.96 (quin,  $J = 7.0$  Hz, 2H, O-C- $\text{CH}_2$ -C), 1.49–1.26 (m, 34H, C- $\text{CH}_2$ -C), 0.88 (t,  $J = 6.8$  Hz, 3H, C- $\text{CH}_3$ ); IR (KBr):  $\nu$  1578  $\text{cm}^{-1}$  (C=C), 2850–2952 (C-H), 3017–3073 (C- $\text{H}_{\text{arom}}$ ).

**2,4-DM-2-C2:** Yield: 0.0081 g (0.89%); elemental analysis for  $\text{C}_{20}\text{H}_{20}\text{N}_2\text{O}$ , Calc: C, 78.92; H, 6.62; N, 9.20%, Found: C, 78.87; H, 6.64; N, 9.24%.  $^1\text{H NMR}$  (400 MHz,  $\text{CDCl}_3$ ,  $\text{Me}_4\text{Si}$ ):  $\delta$  8.41 (d,  $J = 8.5$  Hz,  $1\text{H}_{\text{arom}}$ ), 7.82 (d,  $J = 9.0$  Hz,  $1\text{H}_{\text{arom}}$ ), 7.81 (d,  $J = 7.9$  Hz,  $1\text{H}_{\text{arom}}$ ), 7.68 (d,  $J = 8.1$  Hz,  $1\text{H}_{\text{arom}}$ ), 7.50 (t,  $J = 7.9$  Hz,  $1\text{H}_{\text{arom}}$ ), 7.41 (t,  $J = 6.9$  Hz,  $1\text{H}_{\text{arom}}$ ), 7.38 (d,  $J = 9.0$  Hz,  $1\text{H}_{\text{arom}}$ ), 7.19 (s,  $1\text{H}_{\text{arom}}$ ), 7.12 (d,  $J = 8.7$  Hz,  $1\text{H}_{\text{arom}}$ ), 4.24 (q,  $J = 7.0$  Hz, 2H, O- $\text{CH}_2$ -C), 2.72 (s, 3H,  $\text{C}_{\text{arom}}$ - $\text{CH}_3$ ), 2.41 (s, 3H,  $\text{C}_{\text{arom}}$ - $\text{CH}_3$ ), 1.43 (t,  $J = 7.0$  Hz, 3H, C- $\text{CH}_3$ ); IR (KBr):  $\nu$  1596  $\text{cm}^{-1}$  (C=C), 2858–2933 (C-H), 3014–3049 (C- $\text{H}_{\text{arom}}$ ).

**2,4-DM-2-C3:** Yield: 0.21 g (21%); elemental analysis for  $\text{C}_{21}\text{H}_{22}\text{N}_2\text{O}$ , Calc: C, 79.21; H, 6.96; N, 8.80%, Found: C, 79.30; H, 6.96; N, 8.89%.  $^1\text{H NMR}$  (400 MHz,  $\text{CDCl}_3$ ,  $\text{Me}_4\text{Si}$ ):  $\delta$  8.40 (d,  $J = 8.5$  Hz,  $1\text{H}_{\text{arom}}$ ), 7.82 (d,  $J = 9.0$  Hz,  $1\text{H}_{\text{arom}}$ ), 7.81 (d,  $J = 7.9$  Hz,  $1\text{H}_{\text{arom}}$ ), 7.68 (d,  $J = 8.2$  Hz,  $1\text{H}_{\text{arom}}$ ), 7.50 (t,  $J = 7.7$  Hz,  $1\text{H}_{\text{arom}}$ ), 7.40 (t,  $J = 7.5$  Hz,  $1\text{H}_{\text{arom}}$ ), 7.38 (d,  $J = 9.1$  Hz,  $1\text{H}_{\text{arom}}$ ), 7.19 (s,  $1\text{H}_{\text{arom}}$ ), 7.12 (d,  $J = 8.7$  Hz,  $1\text{H}_{\text{arom}}$ ), 4.13 (t,  $J = 6.5$  Hz, 2H, O- $\text{CH}_2$ -C), 2.72 (s, 3H,  $\text{C}_{\text{arom}}$ - $\text{CH}_3$ ), 2.41 (s, 3H,  $\text{C}_{\text{arom}}$ - $\text{CH}_3$ ), 1.82 (sext,  $J = 7.1$  Hz, 2H, C- $\text{CH}_2$ -C), 1.00 (t,  $J = 7.4$  Hz, 3H, C- $\text{CH}_3$ ); IR (KBr):  $\nu$  1594  $\text{cm}^{-1}$  (C=C), 2857–2940 (C-H), 3018–3058 (C- $\text{H}_{\text{arom}}$ ).

**2,4-DM-2-C6:** Yield: 0.11 g (10%); elemental analysis for  $\text{C}_{24}\text{H}_{28}\text{N}_2\text{O}$ , Calc: C, 79.96; H, 7.83; N, 7.77%, Found: C, 79.76; H, 7.59; N, 7.85%.  $^1\text{H NMR}$  (400 MHz,  $\text{CDCl}_3$ ,  $\text{Me}_4\text{Si}$ ):  $\delta$  8.40 (d,  $J = 8.6$  Hz,  $1\text{H}_{\text{arom}}$ ), 7.82 (d,  $J = 9.0$  Hz,  $1\text{H}_{\text{arom}}$ ), 7.81 (d,  $J = 8.5$  Hz,  $1\text{H}_{\text{arom}}$ ), 7.68 (d,  $J = 8.2$  Hz,  $1\text{H}_{\text{arom}}$ ), 7.51 (t,  $J = 8.1$  Hz,  $1\text{H}_{\text{arom}}$ ), 7.40 (t,  $J = 7.4$  Hz,  $1\text{H}_{\text{arom}}$ ), 7.38 (d,  $J = 9.1$  Hz,  $1\text{H}_{\text{arom}}$ ), 7.19 (s,  $1\text{H}_{\text{arom}}$ ), 7.11 (d,  $J = 8.3$  Hz,  $1\text{H}_{\text{arom}}$ ), 4.16 (t,  $J = 6.5$  Hz, 2H, O- $\text{CH}_2$ -C), 2.72 (s, 3H,  $\text{C}_{\text{arom}}$ - $\text{CH}_3$ ), 2.41 (s, 3H,  $\text{C}_{\text{arom}}$ - $\text{CH}_3$ ), 1.79 (quin,  $J = 7.1$  Hz, 2H, O-C- $\text{CH}_2$ -C), 1.47–1.27 (m, 6H, C- $\text{CH}_2$ -C), 0.85 (t,  $J = 6.9$  Hz, 3H, C- $\text{CH}_3$ ); IR (KBr):  $\nu$  1592  $\text{cm}^{-1}$  (C=C), 2856–2947 (C-H), 3024–3055 (C- $\text{H}_{\text{arom}}$ ).

**2,4-DM-2-C7:** Yield: 0.48 g (43%); elemental analysis for  $\text{C}_{25}\text{H}_{30}\text{N}_2\text{O}$ , Calc: C, 80.17; H, 8.07; N, 7.48%, Found: C, 80.17; H, 8.26; N, 7.49%.  $^1\text{H NMR}$  (400 MHz,  $\text{CDCl}_3$ ,  $\text{Me}_4\text{Si}$ ):  $\delta$  8.40 (d,  $J = 8.6$  Hz,  $1\text{H}_{\text{arom}}$ ), 7.82 (d,  $J = 9.0$  Hz,  $1\text{H}_{\text{arom}}$ ), 7.81 (d,  $J = 8.1$  Hz,  $1\text{H}_{\text{arom}}$ ), 7.68 (d,  $J = 8.2$  Hz,  $1\text{H}_{\text{arom}}$ ), 7.49 (t,  $J = 8.1$  Hz,  $1\text{H}_{\text{arom}}$ ), 7.40 (t,  $J = 7.3$  Hz,  $1\text{H}_{\text{arom}}$ ), 7.38 (d,  $J = 9.1$  Hz,  $1\text{H}_{\text{arom}}$ ), 7.19 (s,  $1\text{H}_{\text{arom}}$ ), 7.12 (d,  $J = 8.1$  Hz,  $1\text{H}_{\text{arom}}$ ), 4.15 (t,  $J = 6.5$  Hz, 2H, O- $\text{CH}_2$ -C), 2.72 (s, 3H,  $\text{C}_{\text{arom}}$ - $\text{CH}_3$ ), 2.41 (s, 3H,  $\text{C}_{\text{arom}}$ - $\text{CH}_3$ ), 1.78 (quin,  $J = 7.0$  Hz, 2H, O-C- $\text{CH}_2$ -C), 1.46–1.21 (m, 8H, C- $\text{CH}_2$ -C), 0.85 (t,  $J = 6.8$  Hz, 3H, C- $\text{CH}_3$ ); IR (KBr):  $\nu$  1592  $\text{cm}^{-1}$  (C=C), 2857–2945 (C-H), 3020–3053 (C- $\text{H}_{\text{arom}}$ ).

**2,4-DM-2-C8:** Yield: 0.082 g (7.1%); elemental analysis for  $\text{C}_{26}\text{H}_{32}\text{N}_2\text{O}$ , Calc: C, 80.37; H, 8.30; N, 7.21%, Found: C, 80.40; H, 8.60; N, 7.21%.  $^1\text{H NMR}$  (400 MHz,  $\text{CDCl}_3$ ,  $\text{Me}_4\text{Si}$ ):  $\delta$  8.40 (d,  $J = 8.6$  Hz,  $1\text{H}_{\text{arom}}$ ), 7.82 (d,  $J = 9.0$  Hz,  $1\text{H}_{\text{arom}}$ ), 7.80 (d,  $J = 8.0$  Hz,  $1\text{H}_{\text{arom}}$ ), 7.68 (d,  $J = 8.2$  Hz,  $1\text{H}_{\text{arom}}$ ), 7.50 (t,  $J$

= 7.7 Hz, 1H<sub>arom</sub>), 7.40 (t,  $J = 7.0$  Hz, 1H<sub>arom</sub>), 7.38 (d,  $J = 9.1$  Hz, 1H<sub>arom</sub>), 7.19 (s, 1H<sub>arom</sub>), 7.12 (d,  $J = 8.4$  Hz, 1H<sub>arom</sub>), 4.15 (t,  $J = 6.5$  Hz, 2H, O-CH<sub>2</sub>-C), 2.72 (s, 3H, C<sub>arom</sub>-CH<sub>3</sub>), 2.41 (s, 3H, C<sub>arom</sub>-CH<sub>3</sub>), 1.78 (quin,  $J = 7.1$  Hz, 2H, O-C-CH<sub>2</sub>-C), 1.46–1.22 (m, 10H, C-CH<sub>2</sub>-C), 0.86 (t,  $J = 6.9$  Hz, 3H, C-CH<sub>3</sub>); IR (KBr):  $\nu$  1594 cm<sup>-1</sup> (C=C), 2856–2946 (C-H), 3015–3040 (C-H<sub>arom</sub>).

**2,4-DM-2-C9:** Yield: 0.16 g (13%); elemental analysis for C<sub>27</sub>H<sub>34</sub>N<sub>2</sub>O, Calc: C, 80.55; H, 8.51; N, 6.96%, Found: C, 80.40; H, 8.76; N, 6.83%. <sup>1</sup>H NMR (400 MHz, CDCl<sub>3</sub>, Me<sub>4</sub>Si):  $\delta$  8.40 (d,  $J = 8.7$  Hz, 1H<sub>arom</sub>), 7.82 (d,  $J = 9.0$  Hz, 1H<sub>arom</sub>), 7.80 (d,  $J = 8.0$  Hz, 1H<sub>arom</sub>), 7.68 (d,  $J = 8.2$  Hz, 1H<sub>arom</sub>), 7.50 (t,  $J = 7.7$  Hz, 1H<sub>arom</sub>), 7.40 (t,  $J = 7.4$  Hz, 1H<sub>arom</sub>), 7.38 (d,  $J = 9.1$  Hz, 1H<sub>arom</sub>), 7.19 (s, 1H<sub>arom</sub>), 7.12 (d,  $J = 8.1$  Hz, 1H<sub>arom</sub>), 4.15 (t,  $J = 6.5$  Hz, 2H, O-CH<sub>2</sub>-C), 2.72 (s, 3H, C<sub>arom</sub>-CH<sub>3</sub>), 2.41 (s, 3H, C<sub>arom</sub>-CH<sub>3</sub>), 1.78 (quin,  $J = 7.0$  Hz, 2H, O-C-CH<sub>2</sub>-C), 1.46–1.22 (m, 12H, C-CH<sub>2</sub>-C), 0.87 (t,  $J = 6.9$  Hz, 3H, C-CH<sub>3</sub>); IR (KBr):  $\nu$  1594 cm<sup>-1</sup> (C=C), 2854–2954 (C-H), 3012–3058 (C-H<sub>arom</sub>).

**2,4-DM-2-C10:** Yield: 0.016 g (1.3%); elemental analysis for C<sub>28</sub>H<sub>36</sub>N<sub>2</sub>O, Calc: C, 80.73; H, 8.71; N, 6.72%, Found: C, 80.83; H, 8.90; N, 6.63%. <sup>1</sup>H NMR (400 MHz, CDCl<sub>3</sub>, Me<sub>4</sub>Si):  $\delta$  8.40 (d,  $J = 8.6$  Hz, 1H<sub>arom</sub>), 7.82 (d,  $J = 9.0$  Hz, 1H<sub>arom</sub>), 7.80 (d,  $J = 7.8$  Hz, 1H<sub>arom</sub>), 7.68 (d,  $J = 8.2$  Hz, 1H<sub>arom</sub>), 7.50 (t,  $J = 8.0$  Hz, 1H<sub>arom</sub>), 7.40 (t,  $J = 7.1$  Hz, 1H<sub>arom</sub>), 7.38 (d,  $J = 9.1$  Hz, 1H<sub>arom</sub>), 7.19 (s, 1H<sub>arom</sub>), 7.12 (d,  $J = 7.7$  Hz, 1H<sub>arom</sub>), 4.15 (t,  $J = 6.5$  Hz, 2H, O-CH<sub>2</sub>-C), 2.72 (s, 3H, C<sub>arom</sub>-CH<sub>3</sub>), 2.41 (s, 3H, C<sub>arom</sub>-CH<sub>3</sub>), 1.78 (quin,  $J = 7.0$  Hz, 2H, O-C-CH<sub>2</sub>-C), 1.46–1.22 (m, 14H, C-CH<sub>2</sub>-C), 0.88 (t,  $J = 6.9$  Hz, 3H, C-CH<sub>3</sub>); IR (KBr):  $\nu$  1594 cm<sup>-1</sup> (C=C), 2855–2945 (C-H), 3016–3037 (C-H<sub>arom</sub>).

**2,4-DM-2-C11:** Yield: 0.46 g (35%); elemental analysis for C<sub>29</sub>H<sub>38</sub>N<sub>2</sub>O, Calc: C, 80.88; H, 8.89; N, 6.51%, Found: C, 80.80; H, 8.53; N, 6.60%. <sup>1</sup>H NMR (400 MHz, CDCl<sub>3</sub>, Me<sub>4</sub>Si):  $\delta$  8.40 (d,  $J = 8.5$  Hz, 1H<sub>arom</sub>), 7.82 (d,  $J = 9.1$  Hz, 1H<sub>arom</sub>), 7.80 (d,  $J = 7.7$  Hz, 1H<sub>arom</sub>), 7.68 (d,  $J = 8.2$  Hz, 1H<sub>arom</sub>), 7.50 (t,  $J = 7.7$  Hz, 1H<sub>arom</sub>), 7.40 (t,  $J = 7.5$  Hz, 1H<sub>arom</sub>), 7.38 (d,  $J = 9.1$  Hz, 1H<sub>arom</sub>), 7.19 (s, 1H<sub>arom</sub>), 7.12 (d,  $J = 8.2$  Hz, 1H<sub>arom</sub>), 4.15 (t,  $J = 6.5$  Hz, 2H, O-CH<sub>2</sub>-C), 2.72 (s, 3H, C<sub>arom</sub>-CH<sub>3</sub>), 2.41 (s, 3H, C<sub>arom</sub>-CH<sub>3</sub>), 1.78 (quin,  $J = 7.0$  Hz, 2H, O-C-CH<sub>2</sub>-C), 1.46–1.22 (m, 16H, C-CH<sub>2</sub>-C), 0.88 (t,  $J = 6.9$  Hz, 3H, C-CH<sub>3</sub>); IR (KBr):  $\nu$  1594 cm<sup>-1</sup> (C=C), 2847–2947 (C-H), 3021–3052 (C-H<sub>arom</sub>).

**2,4-DM-2-C12:** Yield: 0.12 g (9.3%); elemental analysis for C<sub>30</sub>H<sub>38</sub>N<sub>2</sub>O, Calc: C, 81.03; H, 9.07; N, 6.30%, Found: C, 81.12; H, 9.33; N, 6.25%. <sup>1</sup>H NMR (400 MHz, CDCl<sub>3</sub>, Me<sub>4</sub>Si):  $\delta$  8.40 (d,  $J = 8.4$  Hz, 1H<sub>arom</sub>), 7.82 (d,  $J = 9.0$  Hz, 1H<sub>arom</sub>), 7.80 (d,  $J = 7.9$  Hz, 1H<sub>arom</sub>), 7.68 (d,  $J = 8.2$  Hz, 1H<sub>arom</sub>), 7.50 (t,  $J = 8.1$  Hz, 1H<sub>arom</sub>), 7.40 (t,  $J = 7.3$  Hz, 1H<sub>arom</sub>), 7.38 (d,  $J = 9.0$  Hz, 1H<sub>arom</sub>), 7.19 (s, 1H<sub>arom</sub>), 7.12 (d,  $J = 8.3$  Hz, 1H<sub>arom</sub>), 4.15 (t,  $J = 6.5$  Hz, 2H, O-CH<sub>2</sub>-C), 2.72 (s, 3H, C<sub>arom</sub>-CH<sub>3</sub>), 2.41 (s, 3H, C<sub>arom</sub>-CH<sub>3</sub>), 1.78 (quin,  $J = 7.1$  Hz, 2H, O-C-CH<sub>2</sub>-C), 1.46–1.22 (m, 18H, C-CH<sub>2</sub>-C), 0.88 (t,  $J = 6.9$  Hz, 3H, C-CH<sub>3</sub>); IR (KBr):  $\nu$  1593 cm<sup>-1</sup> (C=C), 2849–2948 (C-H), 3014–3042 (C-H<sub>arom</sub>).

**2,4-DM-2-C14:** Yield: 0.076 g (5.4%); elemental analysis for C<sub>32</sub>H<sub>42</sub>N<sub>2</sub>O, Calc: C, 81.31; H, 9.38; N, 5.93%, Found: C, 81.65; H, 9.60; N, 5.91%. <sup>1</sup>H NMR (400 MHz, CDCl<sub>3</sub>, Me<sub>4</sub>Si):  $\delta$  8.40 (d,  $J = 8.6$  Hz, 1H<sub>arom</sub>), 7.82 (d,  $J = 9.0$  Hz, 1H<sub>arom</sub>), 7.80 (d,  $J = 7.6$  Hz, 1H<sub>arom</sub>), 7.68 (d,  $J = 8.2$  Hz, 1H<sub>arom</sub>), 7.50 (t,  $J = 8.2$  Hz, 1H<sub>arom</sub>), 7.40 (t,  $J = 7.5$  Hz, 1H<sub>arom</sub>), 7.38 (d,  $J = 9.1$  Hz, 1H<sub>arom</sub>), 7.19 (s, 1H<sub>arom</sub>), 7.11 (d,  $J = 8.2$  Hz, 1H<sub>arom</sub>), 4.15 (t,  $J = 6.5$  Hz, 2H, O-CH<sub>2</sub>-C), 2.72 (s, 3H, C<sub>arom</sub>-CH<sub>3</sub>), 2.41 (s, 3H, C<sub>arom</sub>-CH<sub>3</sub>), 1.78 (quin,  $J = 7.0$  Hz, 2H, O-C-CH<sub>2</sub>-C), 1.40–1.22 (m, 22H, C-CH<sub>2</sub>-C), 0.88 (t,  $J = 6.8$  Hz, 3H, C-

CH<sub>3</sub>); IR (KBr):  $\nu$  1596 cm<sup>-1</sup> (C=C), 2850–2954 (C–H), 3017–3053 (C–H<sub>arom</sub>).

**2,4-DM-2-C16:** Yield: 0.42 g (21%); elemental analysis for C<sub>34</sub>H<sub>46</sub>N<sub>2</sub>O, Calc: C, 81.55; H, 9.66; N, 5.59%, Found: C, 81.35; H, 9.80; N, 5.33%. <sup>1</sup>H NMR (400 MHz, CDCl<sub>3</sub>, Me<sub>4</sub>Si):  $\delta$  8.40 (d,  $J$  = 8.9 Hz, 1H<sub>arom</sub>), 7.82 (d,  $J$  = 9.0 Hz, 1H<sub>arom</sub>), 7.80 (d,  $J$  = 8.2 Hz, 1H<sub>arom</sub>), 7.68 (d,  $J$  = 8.2 Hz, 1H<sub>arom</sub>), 7.49 (t,  $J$  = 7.0 Hz, 1H<sub>arom</sub>), 7.40 (t,  $J$  = 8.1 Hz, 1H<sub>arom</sub>), 7.38 (d,  $J$  = 9.0 Hz, 1H<sub>arom</sub>), 7.19 (s, 1H<sub>arom</sub>), 7.11 (d,  $J$  = 7.4 Hz, 1H<sub>arom</sub>), 4.15 (t,  $J$  = 6.5 Hz, 2H, O–CH<sub>2</sub>–C), 2.72 (s, 3H, C<sub>arom</sub>–CH<sub>3</sub>), 2.41 (s, 3H, C<sub>arom</sub>–CH<sub>3</sub>), 1.78 (quin,  $J$  = 7.1 Hz, 2H, O–C–CH<sub>2</sub>–C), 1.44–1.22 (m, 26H, C–CH<sub>2</sub>–C), 0.88 (t,  $J$  = 6.9 Hz, 3H, C–CH<sub>3</sub>); IR (KBr):  $\nu$  1596 cm<sup>-1</sup> (C=C), 2849–2955 (C–H), 3017–3053 (C–H<sub>arom</sub>).

**2,4-DM-2-C18:** Yield: 0.20 g (12%); elemental analysis for C<sub>36</sub>H<sub>50</sub>N<sub>2</sub>O, Calc: C, 81.77; H, 9.91; N, 5.30%, Found: C, 81.87; H, 10.21; N, 5.19%. <sup>1</sup>H NMR (400 MHz, CDCl<sub>3</sub>, Me<sub>4</sub>Si):  $\delta$  8.40 (d,  $J$  = 8.7 Hz, 1H<sub>arom</sub>), 7.82 (d,  $J$  = 9.0 Hz, 1H<sub>arom</sub>), 7.80 (d,  $J$  = 7.7 Hz, 1H<sub>arom</sub>), 7.68 (d,  $J$  = 8.2 Hz, 1H<sub>arom</sub>), 7.49 (t,  $J$  = 7.7 Hz, 1H<sub>arom</sub>), 7.40 (t,  $J$  = 7.1 Hz, 1H<sub>arom</sub>), 7.38 (d,  $J$  = 9.0 Hz, 1H<sub>arom</sub>), 7.19 (s, 1H<sub>arom</sub>), 7.11 (d,  $J$  = 8.5 Hz, 1H<sub>arom</sub>), 4.15 (t,  $J$  = 6.5 Hz, 2H, O–CH<sub>2</sub>–C), 2.72 (s, 3H, C<sub>arom</sub>–CH<sub>3</sub>), 2.41 (s, 3H, C<sub>arom</sub>–CH<sub>3</sub>), 1.78 (quin,  $J$  = 7.0 Hz, 2H, O–C–CH<sub>2</sub>–C), 1.48–1.22 (m, 30H, C–CH<sub>2</sub>–C), 0.88 (t,  $J$  = 6.8 Hz, 3H, C–CH<sub>3</sub>); IR (KBr):  $\nu$  1596 cm<sup>-1</sup> (C=C), 2848–2949 (C–H), 3017–3053 (C–H<sub>arom</sub>).

**2,4-DM-2-C20:** Yield: 0.043 g (2.6%); elemental analysis for C<sub>37</sub>H<sub>52</sub>N<sub>2</sub>O, Calc: C, 81.96; H, 10.14; N, 5.03%, Found: C, 81.67; H, 10.36; N, 4.68%. <sup>1</sup>H NMR (400 MHz, CDCl<sub>3</sub>, Me<sub>4</sub>Si):  $\delta$  8.40 (d,  $J$  = 8.4 Hz, 1H<sub>arom</sub>), 7.82 (d,  $J$  = 9.0 Hz, 1H<sub>arom</sub>), 7.80 (d,  $J$  = 8.3 Hz, 1H<sub>arom</sub>), 7.68 (d,  $J$  = 8.2 Hz, 1H<sub>arom</sub>), 7.49 (t,  $J$  = 7.7 Hz, 1H<sub>arom</sub>), 7.40 (t,  $J$  = 7.7 Hz, 1H<sub>arom</sub>), 7.38 (d,  $J$  = 9.1 Hz, 1H<sub>arom</sub>), 7.19 (s, 1H<sub>arom</sub>), 7.11 (d,  $J$  = 8.6 Hz, 1H<sub>arom</sub>), 4.15 (t,  $J$  = 6.5 Hz, 2H, O–CH<sub>2</sub>–C), 2.72 (s, 3H, C<sub>arom</sub>–CH<sub>3</sub>), 2.41 (s, 3H, C<sub>arom</sub>–CH<sub>3</sub>), 1.78 (quin,  $J$  = 7.1 Hz, 2H, O–C–CH<sub>2</sub>–C), 1.44–1.22 (m, 34H, C–CH<sub>2</sub>–C), 0.88 (t,  $J$  = 6.8 Hz, 3H, C–CH<sub>3</sub>); IR (KBr):  $\nu$  1596 cm<sup>-1</sup> (C=C), 2849–2950 (C–H), 3013–3053 (C–H<sub>arom</sub>).

**Table S1.** Crystallographic data of 2,4-DM-4-C8

|                                            |                | 2,4-DM-4-C8                                      |
|--------------------------------------------|----------------|--------------------------------------------------|
| Formula                                    |                | C <sub>26</sub> H <sub>32</sub> N <sub>2</sub> O |
| Fw                                         |                | 388.53                                           |
| <i>T</i> / K                               |                | 173                                              |
| Crystal system                             |                | Monoclinic                                       |
| Space group                                |                | P2 <sub>1</sub> /n                               |
| Unit cell                                  | <i>a</i> / Å   | 8.4288(6)                                        |
|                                            | <i>b</i> / Å   | 19.7044(13)                                      |
|                                            | <i>c</i> / Å   | 14.1559(10)                                      |
|                                            | <i>α</i> / deg | 90                                               |
|                                            | <i>β</i> / deg | 105.4650(10)                                     |
|                                            | <i>γ</i> / deg | 90                                               |
| Volume / Å <sup>3</sup>                    |                | 2266.0(3)                                        |
| <i>Z</i>                                   |                | 4                                                |
| $\delta_{\text{calc}}$ / Mgm <sup>-3</sup> |                | 1.139                                            |
| GOF                                        |                | 1.096                                            |
| Final <i>R</i>                             | <i>R</i> 1     | 0.0452                                           |
| Indices                                    |                |                                                  |
| [ <i>I</i> > 2σ( <i>I</i> )]               | <i>wR</i> 2    | 0.1274                                           |
| <i>R</i> indices                           | <i>R</i> 1     | 0.0518                                           |
| (all data)                                 | <i>wR</i> 2    | 0.1340                                           |



## Thermal behavior of 2,4-DM-4-Cn

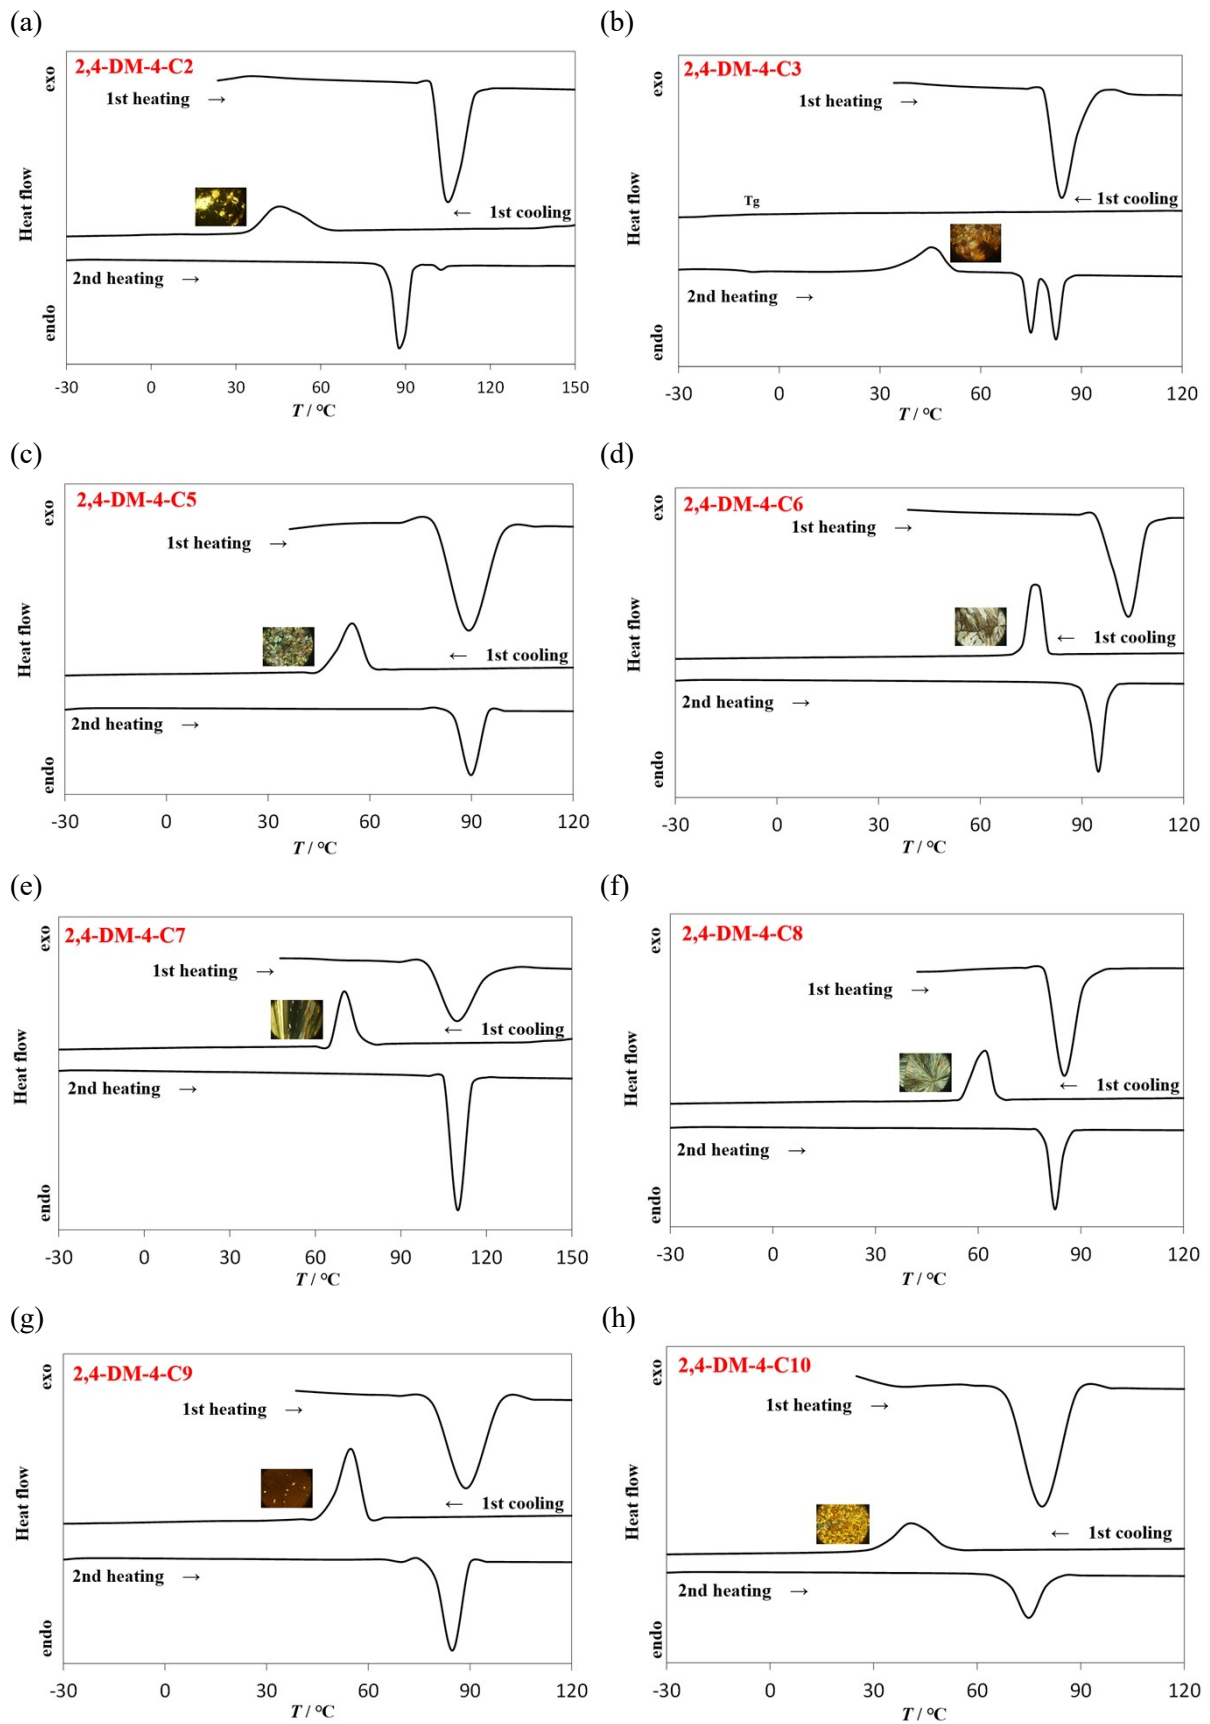

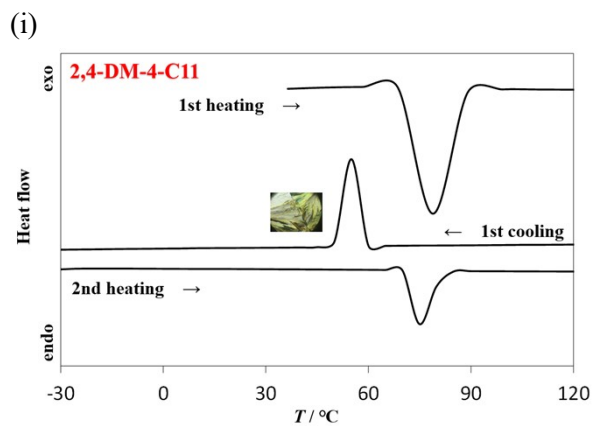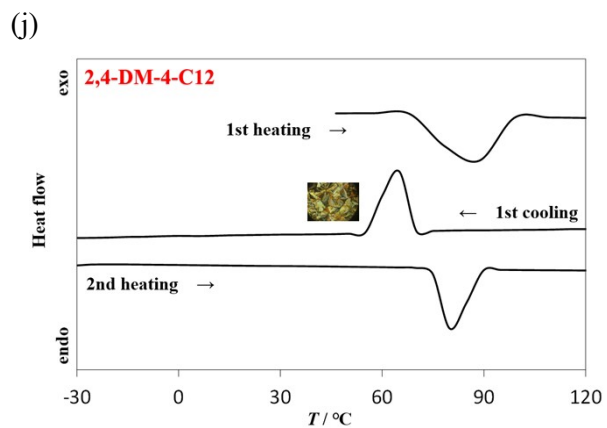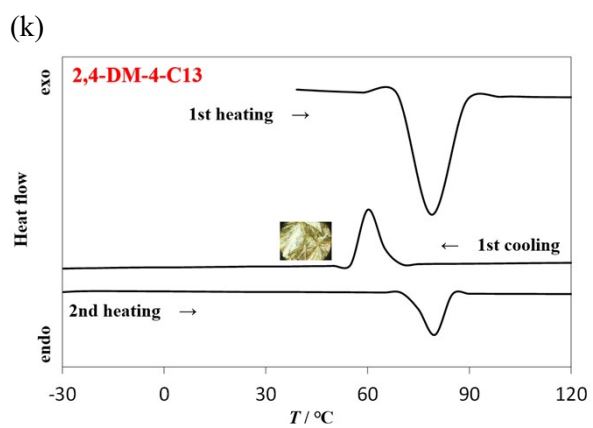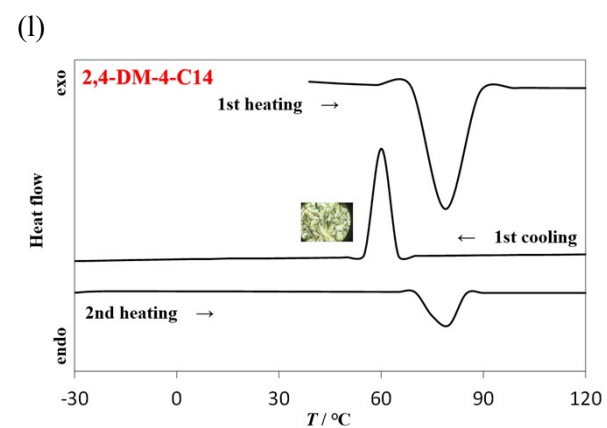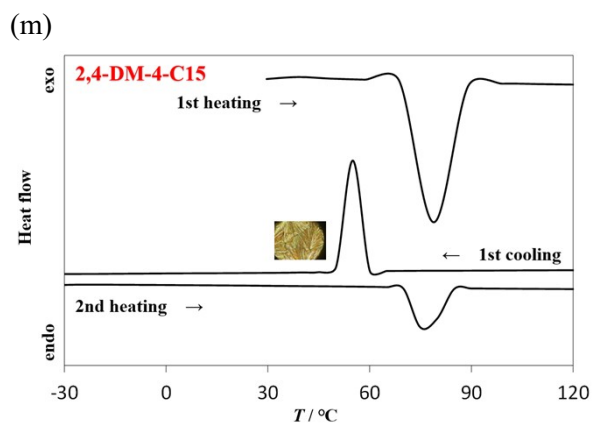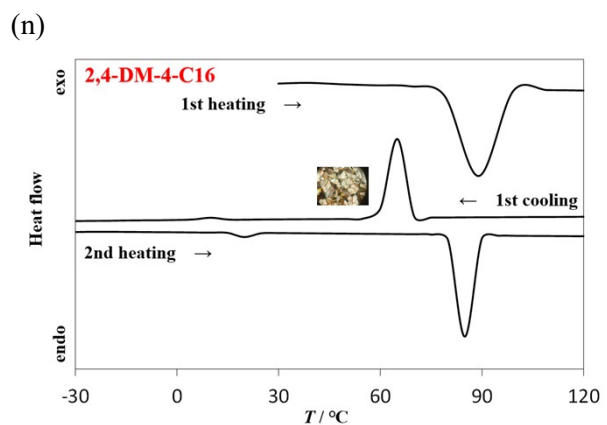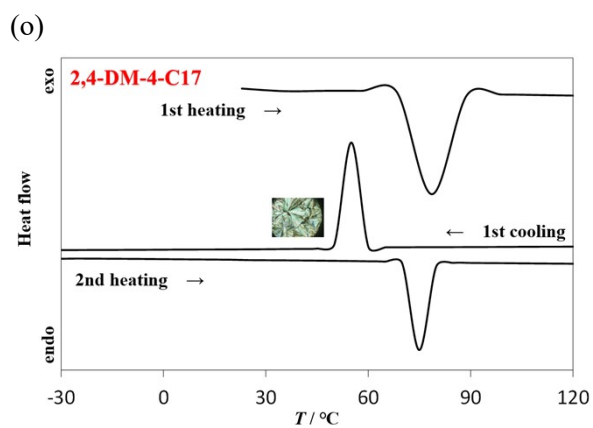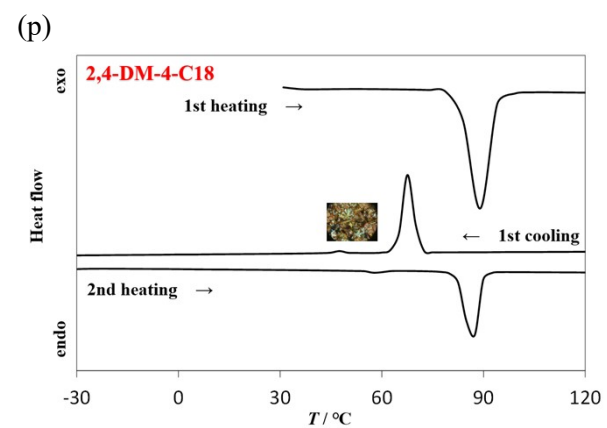

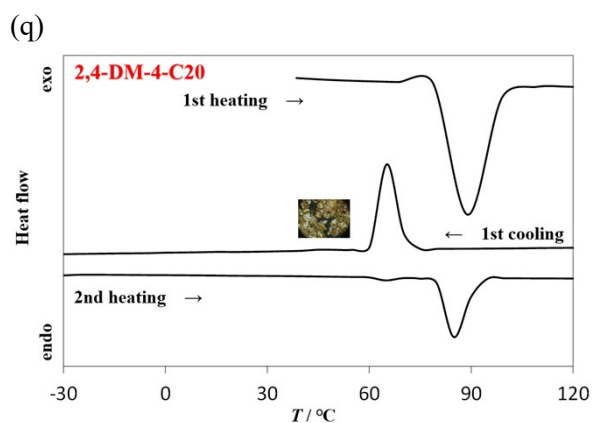

**Fig. S1** DSC diagrams and POM images of (a) 2,4-DM-4-C2, (b) 2,4-DM-4-C3, (c) 2,4-DM-4-C5, (d) 2,4-DM-4-C6, (e) 2,4-DM-4-C7, (f) 2,4-DM-4-C8, (g) 2,4-DM-4-C9, (h) 2,4-DM-4-C10, (i) 2,4-DM-4-C11, (j) 2,4-DM-4-C12, (k) 2,4-DM-4-C13, (l) 2,4-DM-4-C14, (m) 2,4-DM-4-C15, (n) 2,4-DM-4-C16, (o) 2,4-DM-4-C17, (p) 2,4-DM-4-C18, and (q) 2,4-DM-4-C20.



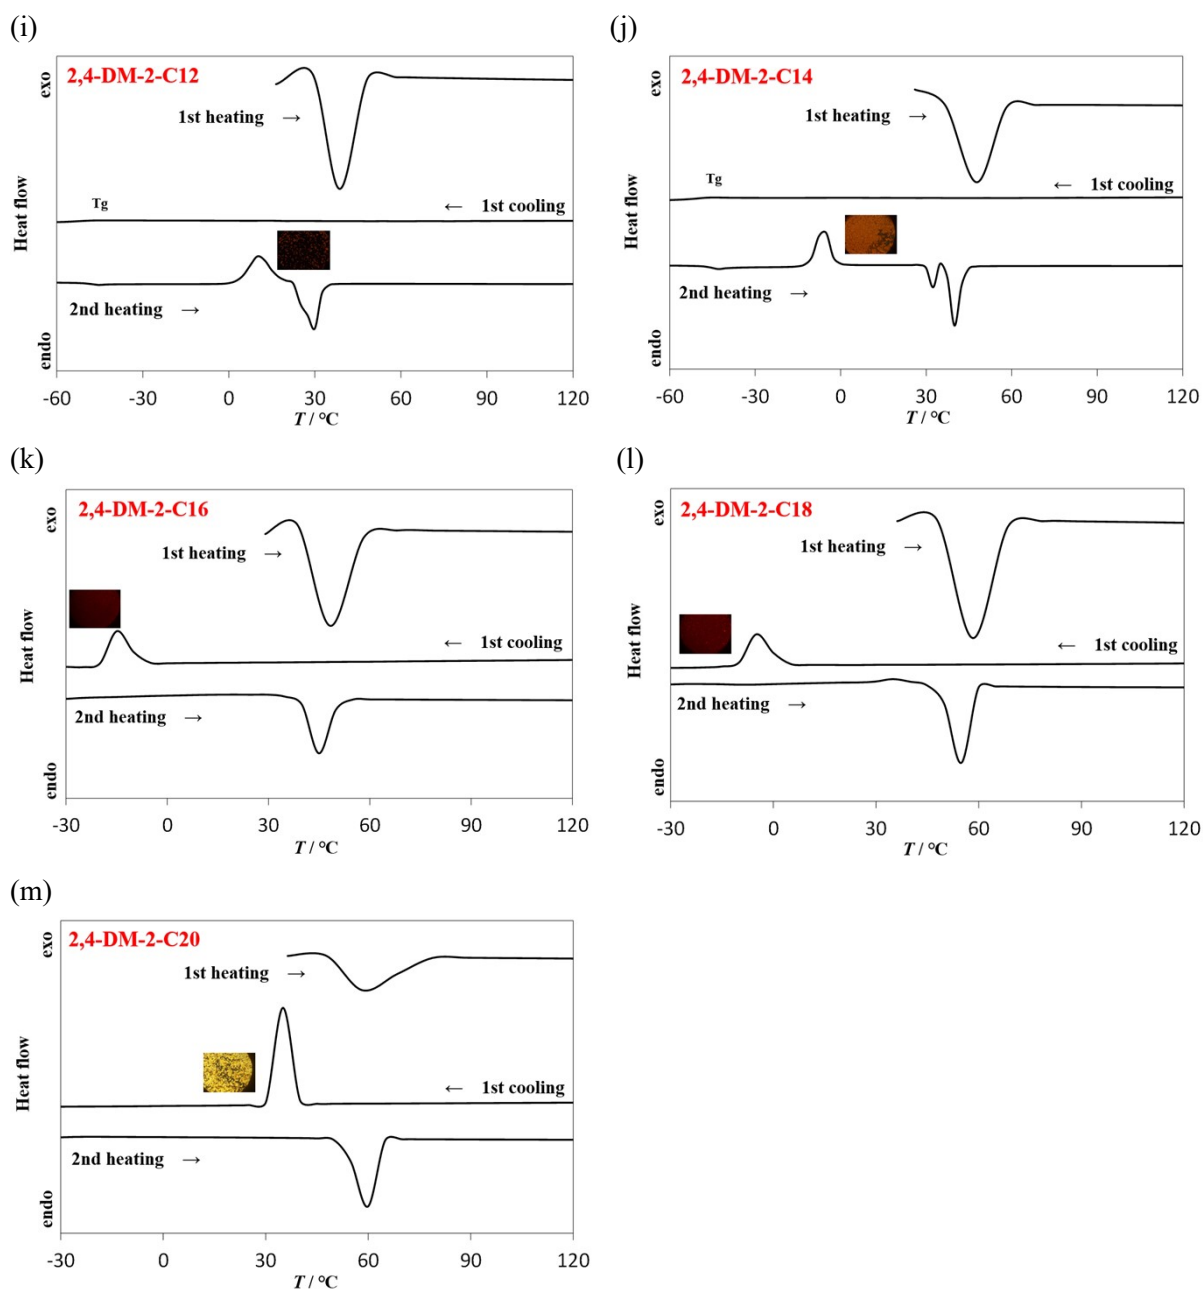

**Fig. S2** DSC diagrams and POM images of (a) 2,4-DM-2-C2, (b) 2,4-DM-2-C3, (c) 2,4-DM-2-C6, (d) 2,4-DM-2-C7, (e) 2,4-DM-2-C8, (f) 2,4-DM-2-C9, (g) 2,4-DM-2-C10, (h) 2,4-DM-2-C11, (i) 2,4-DM-2-C12, (j) 2,4-DM-2-C14, (k) 2,4-DM-2-C16, (l) 2,4-DM-2-C18, (m) 2,4-DM-2-C20.

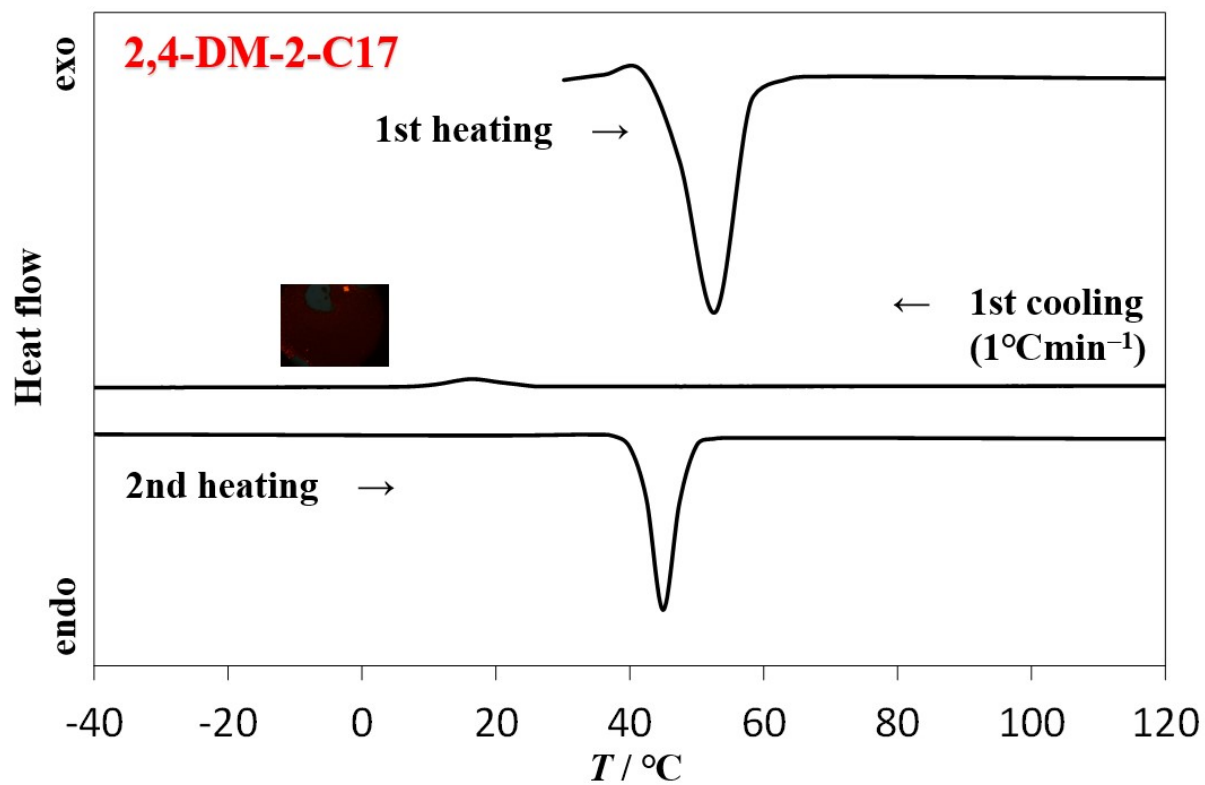

Fig. S3 DSC diagram and POM image of 2,4-DM-2-C17 with the cooling rate of  $1^\circ\text{Cmin}^{-1}$ .

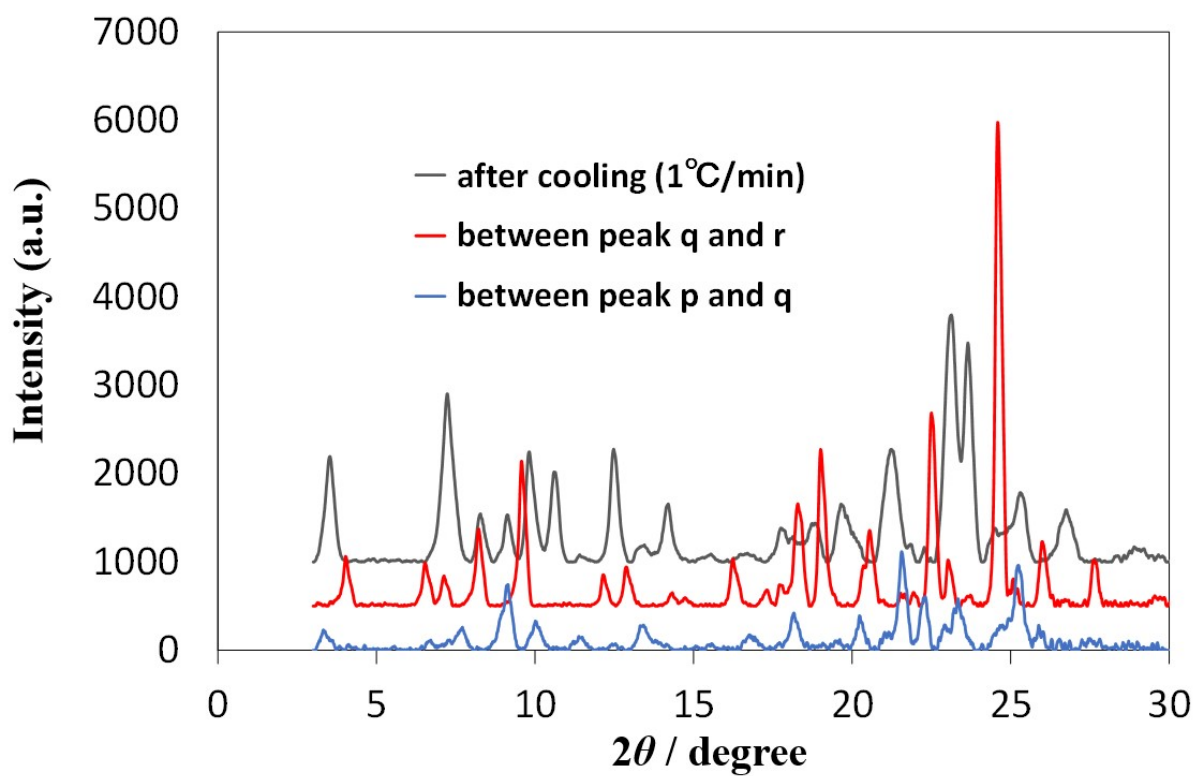

**Fig. S4** Powder XRD patterns of 2,4-DM-2-C17. Blue line: measured at room temperature after cooling (between peak p and q in Figure 4d). Red line: measured at 30°C (between peak q and r in Figure 4d). Gray line: crystallized sample with slow cooling rate ( $1^{\circ}\text{Cmin}^{-1}$ ).

(a)

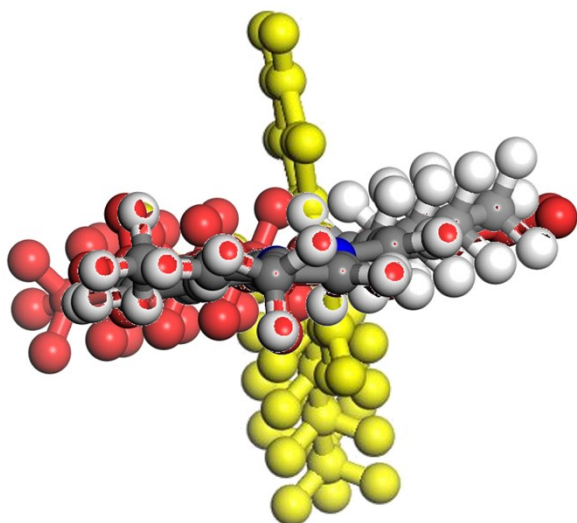

(b)

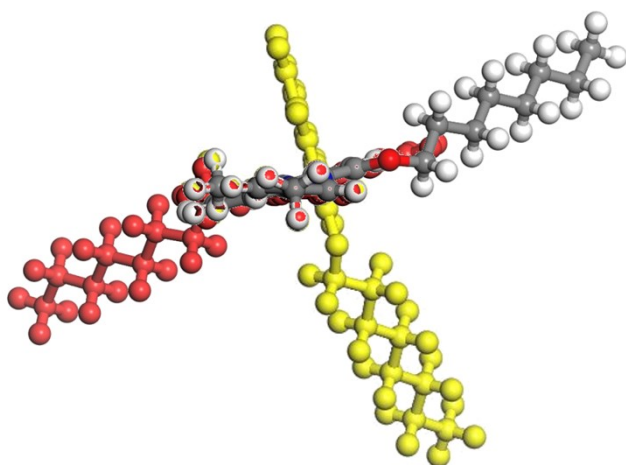

**Fig. S5** Rotation model around azo group of (a) 2,4-DM-4-*Cn* and (b) 2,4-DM-2-*Cn*. The gray molecule is the calculated structure optimized by using DFT calculation. The yellow molecule is 90° rotated view, and the red molecule is 180° rotated view.



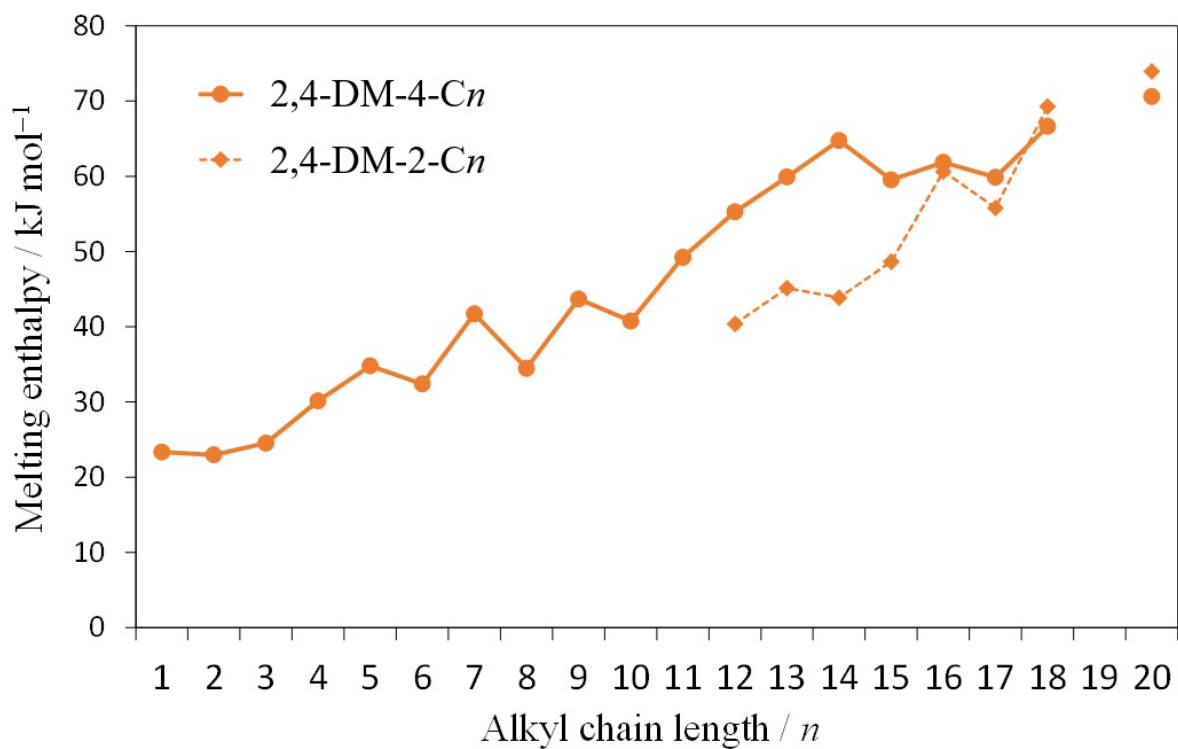

**Fig. S6** Melting enthalpies of 2,4-DM-4-*C<sub>n</sub>* (orange circles) and 2,4-DM-2-*C<sub>n</sub>* (orange squares).
